1     **Ischemia promotes hypertrophic nerve trunk formation and enteric neuron cell**  
2                                   **death in Hirschsprung's disease**

3  
4     Deshu Xu<sup>1,2#</sup>, Weiwei Liang<sup>1#</sup>, Chaoting Lan<sup>1</sup>, Lanying Li<sup>1</sup>, Weiyong Zhong<sup>1</sup>, Meng  
5     Yao<sup>1,4</sup>, Xiaoyu Zuo<sup>1</sup>, Jixiao Zeng<sup>1</sup>, Wei Zhong<sup>1</sup>, Qiang Wu<sup>1</sup>, Andrew M Lew<sup>5</sup>,  
6     Wenhao Zhou<sup>1</sup>, Huimin Xia<sup>1\*</sup>, Fan Bai<sup>2\*</sup>, Yuxia Zhang<sup>1,3,6\*</sup> and Yan Zhang<sup>1,3\*</sup>

7  
8     <sup>1</sup>Department of Pediatric Surgery, Guangdong Provincial Key Laboratory of Research  
9     in Structural Birth Defect Disease, Guangdong Provincial Children's Medical  
10    Research Center, Guangzhou Institute of Pediatrics, Guangzhou Women and  
11    Children's Medical Center, Guangzhou Medical University, Guangzhou, 510623,  
12    Guangdong, China

13    <sup>2</sup>Biomedical Pioneering Innovation Center, Beijing Advanced Innovation Center for  
14    Genomics, Peking University, Beijing, 100871, China

15    <sup>3</sup>The Third Affiliated Hospital of Zhengzhou University, Zhengzhou, 450052, China.

16    <sup>4</sup>Tianjin Institute of Immunology, Key Laboratory of Immune Microenvironment and  
17    Disease of the Ministry of Education, Department of Immunology, School of Basic  
18    Medical Sciences, Tianjin Medical University, Tianjin, 300070, China

19    <sup>5</sup>Walter and Eliza Hall Institute of Medical Research, Department of Medical Biology  
20    and Department of Microbiology & Immunology, University of Melbourne; Parkville,  
21    Victoria 3052, Australia.

22    <sup>6</sup>Lead contact.

23    #These authors contributed equally.

24    \*Corresponding authors

25

26    **Correspondence**    to:    [yuxia.zhang@gwcmc.org](mailto:yuxia.zhang@gwcmc.org),    [huiminxia@hotmail.com](mailto:huiminxia@hotmail.com),  
27    [fbai@pku.edu.cn](mailto:fbai@pku.edu.cn), or [yannizy@gwcmc.org](mailto:yannizy@gwcmc.org)

28

29    **ABSTRACT**

30    **Objective** Enteric nervous system dysfunction is linked to digestive and neurological  
31    disorders. Hirschsprung's disease (HSCR) is characterized by the loss of enteric  
32    neuron cells (ENCs) in the distal colon. Embryonic enteric neural crest cell (ENCC)  
33    migration defects contribute to HSCR development in some infants, but postnatal  
34    factors that regulate ENC fate are undetermined. We sought to establish how postnatal

35 changes contribute to HSCR by profiling the colonic microenvironment of HSCR  
36 infants.

37 **Design** In this study, we recruited infants with HSCR, infants with anorectal  
38 malformations but normal ENC development (CT), and a group of age-matched  
39 healthy control subjects. Laboratory findings and clinical manifestations were  
40 recorded. Single-cell and spatial transcriptome sequencing were applied to colonic  
41 tissues from a sub-cohort of CT and HSCR infants. Patient specimens, a mouse model  
42 of neonatal ischemic enterocolitis, and *Sox10* knockdown mouse (*Sox10*<sup>WT/MUT</sup>) were  
43 used to reveal the factors that lead to ENC loss in HSCR infants.

44 **Results** We discover that intestinal ischemia promotes CLDN1<sup>+</sup> hypertrophic nerve  
45 trunk formation and ENC death. Mechanistically, ischemia leads to defective nitric  
46 oxide (NO) signaling in ENCs, which aggravates mitochondria damage and  
47 caspase-mediated apoptosis that can be ameliorated by a NO donor drug.

48 **Conclusion** We show that ischemia contributes to postnatal ENC loss in HSCR  
49 infants and suggest that NO donor drugs may alleviate ischemia-related ENC death.

50

## 51 **WHAT IS ALREADY KNOWN ON THIS TOPIC**

52 ● Hirschsprung's disease (HSCR) is characterized by the absence of enteric nerve  
53 cells (ENCs) in distal colons, which is caused by defective enteric neural crest  
54 cell (ENCC) migration and colonization during the embryonic stage. However,  
55 extensive ENCC-derived glial cells can be observed in aganglionic colons of  
56 HSCR patients.

## 57 **WHAT THIS STUDY ADDS**

58 ● HSCR patients display ischemia-like signatures in the colon, highlighted by  
59 extensive platelet-collagen aggregation in the blood vessels of both ganglionic  
60 and aganglionic colon biopsies.

61 ● In ganglionic colon biopsies of HSCR infants, ENCs present ischemic  
62 phenotypes, including zinc ion accumulation, mitochondria damage, and  
63 Caspase-mediated apoptosis. A nitric oxide donor drug ameliorates  
64 ischemia-induced ENC death by promoting mitophagy.

65 ● Hypertrophic nerve trunks (HNTs) are wrapped by *CLDN1*<sup>+</sup> fibroblasts  
66 (*CLDN1*<sup>+</sup>FLCs). This structure is formed by ischemic stress, a neuron-derived  
67 growth factor (FGF1), and an inflammatory signal (TNF- $\alpha$ ).

68

69

70

## 71 HOW THIS STUDY MIGHT AFFECT RESEARCH, PRACTICE OR POLICY

- 72 ● Our results reveal that ischemia-induced postnatal ENC loss is a novel  
73 pathogenic mechanism of HSCR and suggest that NO donor drugs may be useful  
74 in treating ischemia-related ENC death.

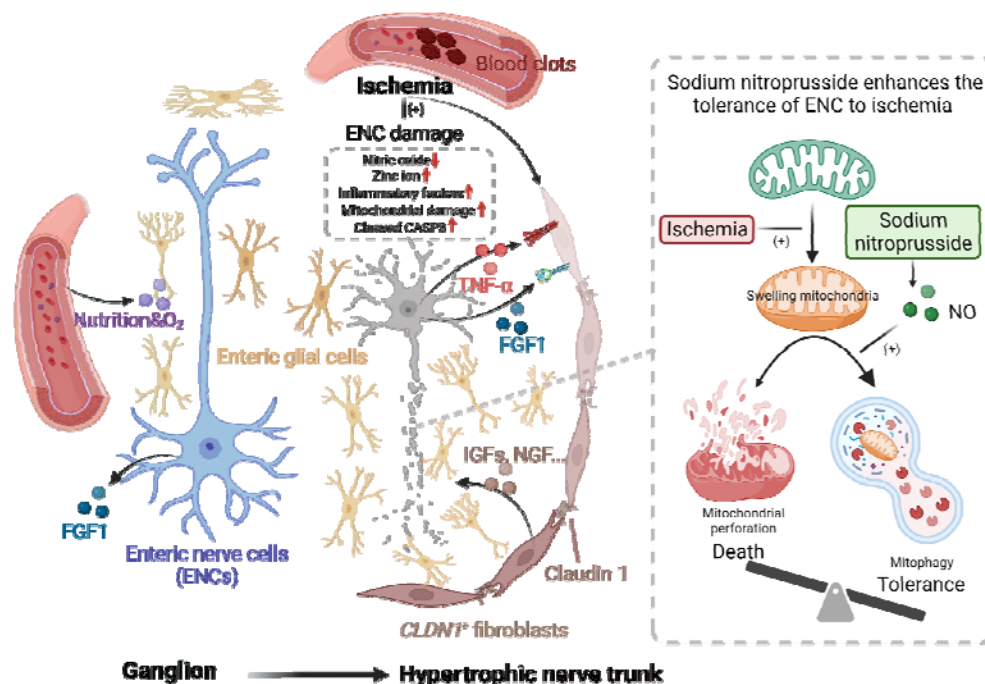

75 **The schematic finding of the study.** The intestines of infants with HSCR display extensive  
76 ischemia, highlighted by platelet-collagen aggregation in the blood vessels. CLDN1<sup>+</sup>  
77 fibroblasts are differentiated under ischemia stress with a neuron-derived growth factor  
78 (FGF1) and an inflammatory cytokine (TNF- $\alpha$ ). Nitric oxide (NO) synthesis is reduced in  
79 enteric nerve cells (ENCs) under ischemia, leading to zinc accumulation, mitochondria  
80 damage, and caspase-dependent cell death. Providing an NO donor drug (sodium  
81 nitroprusside) prevented ENC death by inducing mitophagy in a neonatal ischemic  
82 enterocolitis (NIE) model.

83

## 84 INTRODUCTION

85 The enteric nervous system (ENS) is the largest component of the autonomic nervous  
86 system and orchestrates gastrointestinal homeostasis and motility. ENS dysfunction is  
87 linked to a vast range of digestive diseases and neurological disorders including  
88 inflammatory bowel disease and autism<sup>1,2</sup>. During embryonic stage, the enteric neural  
89 crest cells (ENCCs) migrate from the foregut toward the distal hindgut, colonize, and  
90 differentiate into enteric nerve cells (ENCs) and glial cells<sup>3</sup>. Defective ENCC

91 migration is linked to Hirschsprung's disease (HSCR), an intestinal motility disorder  
92 leading to severe intestinal obstruction in infancy. The disease is characterized by the  
93 absence of ENCs in the distal colon<sup>4</sup>. Previous studies have shown that genetic  
94 predispositions (such as variants of *RET*, *SOX10*, and *EDNRB*) and nutritional factors  
95 (such as retinoic acid deficiency) contribute to HSCR by impairing ENCC  
96 migration<sup>4-10</sup>. However, HSCR does not follow simple mendelian inheritance<sup>5 10</sup>, and  
97 extensive ENCC-derived enteric glial cells have been observed in aganglionic colons  
98 in HSCR<sup>11 12</sup>. Altogether, the specific mechanism of HSCR remains elusive.

99

100 Remodeling of ENCs can occur postnatally. ENC loss and injury have been observed  
101 in patients with necrotizing enterocolitis<sup>13</sup> and inflammatory bowel disease<sup>14 15</sup>.  
102 Postnatal herpes simplex virus 1 infection promotes neutrophil-mediated destruction  
103 of the ENCs and HSCR-like megacolon in mice<sup>16</sup>. Given that the intestinal  
104 microenvironment changes dramatically after birth<sup>4</sup>, it is essential to determine  
105 whether abnormal intestinal factors contribute to disease aggregation postnatally.  
106 Currently, the cellular heterogeneity of human ENCs have been studied by spatial and  
107 single-cell transcriptomic sequencing<sup>17-20</sup>, but definitive characterization of ENCs in  
108 HSCR is lacking. Here, we present the cellular landscape of the intestinal ganglia and  
109 hypertrophic nerve trunks (HNTs) in patients with HSCR at single cell resolution and  
110 spatially. We show that intestinal ischemia is an important pathogenic mechanism  
111 (and potential therapeutic target) for infants with HSCR.

112

## 113 **MATERIALS AND METHODS**

### 114 **Participants**

115 The study procedures were approved by the Medical Ethics Committee of Guangzhou  
116 Women and Children's Medical center (ID: 2020-42601), and complied with the  
117 international ethical guidelines for research involving human subjects as stated in the  
118 Helsinki declaration. The legal guardians of all patients assigned written informed  
119 consents. 36 age-matched healthy donors (H-CT), 28 anorectal malformations patients  
120 (CT), and sporadic HSCR patients (n=172) were recruited. Colonic tissues from 14  
121 HSCR patients and 8 CT patients were used for constructing single-cell RNA  
122 transcriptome and spatial transcriptome. Whole exome sequencing was performed for  
123 14 HSCR patients whose colonic biopsies were used for scRNA-seq. Bulk RNA-seq  
124 was applied to colonic tissues collected from a separated sub-cohort of subjects

125 containing 60 HSCR patients and 13 CT patients. Participant details including  
126 developmental stage and sex were available at **online supplemental table 1. The**  
127 **random ID (Masked\_ID) cannot reveal the identity of the study subjects and was**  
128 **not known to anyone outside the research group.**

129

### 130 **Single-cell RNA sequencing**

131 Fresh tissues were processed with Chromium Next GEM Single Cell 5' Kit v2 (10x  
132 Genomics, Cat# 1000263) following manufacturer's instructions. The libraries were  
133 sequenced with Illumina Novaseq 6000. Cell Ranger (v.6.1.1) was used to process the  
134 sequencing results. The outputs of Cell Ranger were processed by scanpy package<sup>21 22</sup>  
135 (v.1.7.1). The cell differentiation trajectory was predicted by Monocle 3<sup>23 24</sup> (v.1.0.0).  
136 The cell-cell interactions were predicted by CellChat<sup>25</sup> (v.1.1.0).

### 137 **Spatial transcriptome sequencing**

138 Frozen tissues were processed with Visium Spatial Tissue Optimization Slide &  
139 Reagents Kit (10x Genomics, Cat# 1000193) and Visium Spatial Gene Expression  
140 Slide & Reagents Kit (10x Genomics, Cat# 1000187) following the manufacturer's  
141 instructions. The cDNA libraries were sequenced with Illumina Novaseq 6000.  
142 Spaceranger (v.1.3.1) was used to process the sequencing results. The outputs were  
143 processed with the Seurat package<sup>26</sup> (v.4.0.1).

### 144 **Bulk RNA sequencing**

145 RNA was extracted from frozen tissues using FreeZol Reagent kit (Vazyme, Cat#  
146 R711-01). NEBNext Ultra II RNA Library Prep Kit for Illumina (New England  
147 Biolabs Inc, Cat# E7775) was used to construct cDNA libraries which were  
148 sequenced with Illumina Novaseq 6000. The raw reads were filtered by fastp<sup>27</sup>  
149 (v.0.23.2) and aligned to human genomics using STAR<sup>28</sup> (v.2.7.4a). CIBERSORTx<sup>29</sup>  
150 were used to estimate the abundance of spatial transcriptome clusters in bulk  
151 RNA-seq data. The gene set score was calculated by Seurat package.

### 152 **Pathway enrichment**

153 Metascape<sup>30</sup> (<https://metascape.org/>) with default parameters were used for pathway  
154 enrichment. DEGs with adjusted *p* value lower than 0.05 and absolute value of  
155 log<sub>2</sub>(fold change) larger than 0.4 were used for pathway enrichment. Up-regulated and  
156 down-regulated DEGs were analyzed separately.

### 157 **Whole exome sequencing**

158 DNA was extracted from blood using QIAamp DNA Mini Kit (Qiagen, Cat# 51304).

159 Libraries were built using NEBNext® Ultra™ II DNA Library Prep Kit for Illumina®  
160 (NEB, Cat# E7645L) and SureSelectXT Human All Exon V6 (Agilent Technologies,  
161 Cat# 54898). NovaSeq 6000 was used for sequencing. The sequencing results were  
162 filtered by fastp<sup>27</sup> (v.0.23.2) and were processed according to "GATK Best Practices"  
163 pipeline, in which bwa<sup>31</sup> (v.0.7.17), samtools<sup>32</sup> (v.1.13), picard<sup>33</sup> (v.2.21.4), and  
164 GATK<sup>34</sup> (v.4.2.0.0) were used. ANNOVAR<sup>35</sup> (v.2020-06-08) and VEP<sup>36</sup> (v.104) were  
165 used to annotate the variants.

#### 166 **Mice**

167 C57BL/6 mice were purchased from Charles River (Beijing, China). *Sox10*<sup>WT/MUT</sup>  
168 C3H mice were purchased from the Jackson lab (Cat# 000290). All mice were  
169 maintained in specific-pathogen-free (SPF) facility at the Guangzhou Medical  
170 University. The experimental protocols of this study were approved by the Ethics  
171 Committee of Guangzhou Medical University (ID: 2021-059B00). All experiments  
172 were performed in accordance with procedures outlined in the "Guide for Care and  
173 Use of Laboratory Animals" (National Resource Council, National Academy Press,  
174 Washington D.C).

175

#### 176 **Establishment of the neonatal ischemic enterocolitis (NEI) mouse model**

177 Neonatal ischemic enterocolitis was induced in 5-day-old mice of either gender,  
178 which were randomly divided into control and experimental groups, by gavage  
179 feeding newborn mice with enteric bacteria obtained from SPF wild type C57BL/6  
180 mice or *Sox10*<sup>WT/MUT</sup> C3H mice once per day for the first and second day of the  
181 experiment. Additionally, the mice were subjected to hypoxia (5% O<sub>2</sub>-95% N<sub>2</sub>) for 2  
182 min in a hypoxia chamber (STEMCELL) twice daily and followed by 4 °C treatment  
183 for 10 min from the third to fifth day. Mice were then sacrificed for histopathological  
184 analysis. Colon tissues were collected for further analyses.

#### 185 **Cell culture**

186 For MEF isolation, mouse embryos (12.5-14 d) dissected out of head and red organs  
187 were washed with PBS, finely minced and treated with 1 ml of 0.05% trypsin EDTA  
188 (Gibco, Invitrogen) for 15 min at 37 °C. Isolated MEF cells were cultured in  
189 high-glucose (4.5 g/L) Dulbecco's modified Eagle's medium (DMEM, Gibco, San  
190 Diego, CA) supplemented with 10% fetal bovine serum (FBS, Hyclone, Logan, UT),  
191 100 U/mL penicillin, 100 µg/mL streptomycin (Invitrogen Life Technologies), 15

192 mM 4-(2-hydroxyethyl)-1-piperazineethane sulfonic acid (HEPES) (pH 7.4,  
193 Invitrogen Life Technologies, San Diego, CA) complete medium.

194 SH-SY5Y cells (ATCC) were cultured in a 1:1 mixture of ATCC-formulated Eagle's  
195 Minimum Essential Medium (ATCC) and F12 medium (Gibco, San Diego, CA)  
196 supplemented with 10% FBS, 100 U/mL penicillin, 100 µg/mL streptomycin  
197 (Invitrogen Life Technologies), 15 mM HEPES (pH 7.4, Invitrogen Life  
198 Technologies, San Diego, CA).

199 All cells were incubated in humidified atmosphere of 95% O<sub>2</sub> and 5% CO<sub>2</sub> at 37 °C  
200 incubator (Thermo Fisher Scientific). As for ischemia stress, cells were cultured in  
201 DMEM without glucose (Gibco, San Diego, CA) at 37 °C incubation with 5% CO<sub>2</sub>, 1%  
202 O<sub>2</sub> and balanced N<sub>2</sub>.

### 203 **Quantification and statistical analysis**

204 Statistical analysis of DEGs identification was performed by two-sided  
205 Mann-Whitney U test and bonferroni correction using all genes in the dataset.  
206 Two-side Mann-Whitney U test was also employed for the statistical analysis of gene  
207 set score. Statistical analysis of pathway enrichment was performed by  
208 hypergeometric test and Benjamini-Hochberg *P*-value correction algorithm. Statistical  
209 analysis and graphs of other data were generated using GraphPad Prism v9. Pairwise  
210 comparisons were analyzed using two-tailed unpaired Student's *t*-test and multiple  
211 comparisons were analyzed with one-way analysis of variance (ANOVA). For all  
212 graphs and heatmaps, \**P* < 0.05, \*\**P* < 0.01, \*\*\**P* < 0.001, and \*\*\*\**P* < 0.0001. 95%  
213 confidence interval for all statistical analysis.

214 Detailed description of analysis pipeline, antibodies, and experimental protocols were  
215 available at **online supplemental methods**.

216

217

## 218 **RESULTS**

### 219 **Cohort characteristics, single-cell and spatial transcriptomic profiling of the** 220 **colonic microenvironment for infants with HSCR.**

221 In this study, we assembled 3 cohorts: age-matched healthy controls (H-CT, n=36),  
222 control subjects with anorectal malformations but normal ENC development (CT,  
223 n=28), and sporadic HSCR patients (n=172). Clinical manifestations and major  
224 laboratory findings for the participants are presented in **figure 1A (online**  
225 **supplemental table 1)**. HSCR patients were mainly males (80.8%), the majority of

226 whom had abdominal distention (89.5%), vomiting (66.3%), and delayed meconium  
227 passage (74.4%). Immunological workup revealed significantly increased circulating  
228 platelet and lymphocyte counts in HSCR compared with H-CT and CT subjects.

229

230 We generated spatial and single-cell transcriptomes for 8 CT and 14 HSCR patients  
231 (**figure 1B**). We also performed whole exome sequencing for the 14 HSCR patients.  
232 For independent validation, we generated bulk RNA sequencing using colonic  
233 biopsies from a separate sub-cohort of CT (n=13) and HSCR patients (aganglionic  
234 HSCR, HA, n=54; ganglionic HSCR, HG, n=53.) (**figure 1A**). We analyzed the rare  
235 genetic variants from the 14 HSCR patients against the list of candidate HSCR risk  
236 genes (**online supplemental table 2**), and no known pathogenic variant was identified  
237 (**figure 1C and online supplemental table 3**). This was consistent with the sporadic  
238 nature of our HSCR cohort.

239

240 For spatial transcriptomes, we obtained 50,234 spots (ST-spots) and partitioned them  
241 into 13 clusters (ST-clusters) using a semi-supervised analysis (**see Method**).  
242 ST-clusters exhibited transcriptional signatures that are consistent with their spatial  
243 distributions (**figure 2A, 2B, and online supplemental figure 1A-1D**). For  
244 scRNA-seq, we partitioned 193,800 high-quality cells into 61 unique populations  
245 (**online supplemental figure 1E and 1F**) according to unsupervised clustering and  
246 known marker genes (**online supplemental figure 2 and online supplemental table**  
247 **4**). ENC<sub>s</sub> were not captured in our scRNA-seq dataset due to technical limitations.  
248 Therefore, we included a published single-nucleus transcriptome dataset for ENC<sub>s</sub> in  
249 our analysis<sup>37</sup>.

250

251 For combined ST-seq and scRNA-seq analysis, we utilized an anchor-based workflow  
252 to link scRNA-seq-defined cell populations with ST-spots (**see Method**). This allowed  
253 spatial alignment of 37 scRNA-seq populations on the colonic biopsies (**figure 2C**).  
254 For example, *BEST4*<sup>+</sup> enterocytes were located at the top of the mucosa (C1),  
255 undifferentiated epithelial cells (TA and Epi<sub>stem</sub>) at the base of the mucosa (C2),  
256 pericytes and endothelial cells near blood vessels (C11), and immune cells at the  
257 mucosal-associated lymph follicles (C4). Other scRNA-seq-defined cell populations  
258 have diffused distribution patterns and were unable to be defined spatially.

259



260 **Identification of differentially enriched ST-clusters and cell types in HSCR.**

261 By comparing HSCR with control subjects, we identified 3 unique ST-clusters (**figure**  
262 **2D**). ST-cluster C12, which contained ENC-related signatures, were absent in the  
263 aganglionic HSCR (HA) colons. ST-cluster C13, encompassing glial cells, *CLDN1*<sup>+</sup>  
264 fibroblast-like cells (FLCs) and *APOD*<sup>+</sup> FLCs, was only identified in HA colons.  
265 ST-cluster C10, a muscular-associated cluster enriched with cellular stress-related  
266 pathways, was present in 5 HG and 1 HA colons but was absent in CT colons. (**figure**  
267 **2A-2D**). At the single cell level, our data showed that many immune cells, including  
268 Th17, macrophages and plasma cells, were significantly increased in the colons of  
269 patients with HSCR compared with control subjects (**online supplemental figure 1F**).  
270 This potentially contributes to enterocolitis risk in patients with HSCR<sup>38</sup>.

271

272 **Analysis of muscular associated spatial cluster C10 reveals prevalence of**  
273 **ischemic stress in HSCR.**

274 We first analysed C10, a muscular ST-cluster identified only in infants with HSCR  
275 (**figure 2D**). Bulk RNA-seq data deconvolution confirmed that C10 was significantly  
276 increased in HG and HA colons compared with the control subjects (**figure 3A**). To  
277 examine whether C10 may represent a transitional or intermediate disease state, we  
278 compared C10 with the rest of the muscular regions (C8, C9) (**figure 3B, 3C, and**  
279 **online supplemental figure 3A**). The upregulated genes in C10 included myocardial  
280 infarction-related transcription factors (such as *FOSL1* and *THBS1*)<sup>39</sup>, genes that  
281 mediate misfolded protein responses, chemotaxis, and response to zinc ion. The  
282 downregulated genes encode collagens (*COL1A1*, *COL1A2*, *COL4A1*) and regulate  
283 muscular contraction (*ACTG2*, *CALD1*, *MYH11*). These changes resemble cellular  
284 responses to ischemic stress<sup>39</sup>. Indeed, analysis of the ischemic response gene set  
285 showed that C10 had the highest ischemia score compared with the rest of the  
286 muscular regions (**figure 3D**). At the cellular level, C10 contained increased numbers  
287 of vascular smooth muscle cells (vSMC) and ischemia-related pericytes (*CCL2*<sup>+</sup>  
288 Pericyte) but had decreased myofibroblast (*ACTA2*<sup>+</sup> FLCs) cells (**figure 3D and**  
289 **online supplemental figure 3B-3E**).

290

291 Activated platelets are known to infiltrate ischemic tissues and form microthrombi  
292 composed of platelets and collagens<sup>40</sup>. Zinc is released from the platelets and further  
293 exacerbates thrombosis<sup>41</sup>. We found platelet-collagen aggregation in the vasculature

294 of the HG and HA colons but not in the control subjects (**figure 3E and 3F**). Zinc-dye  
295 staining (FluoZin) showed that zinc ion was increased significantly in the vascular  
296 walls in HSCR compared with the control colons (**figure 3G and 3H**). Consistently,  
297 the score of genes that corresponded to cellular responses to zinc ion were  
298 significantly up-regulated in vascular endothelial cells in HSCR compared with  
299 control colons (**online supplemental figure 3F**).

300

### 301 **Identification of HNT-associated *CLDNI*<sup>+</sup> FLCs in HSCR.**

302 HNTs (C13) consisting of glial cells and ENC fibers, is a feature of HSCR<sup>11</sup>. To  
303 reveal mechanisms underlying HNT formation, we compared HNTs (C13) with  
304 ganglia (C12). Genes that are expressed by glial cells (*GPM6B*, *MPZ* and *GFRA3*)  
305 and fibroblast-like cells (*COL3A1*, *COL1A1*) (**online supplemental figure 2**), and  
306 genes that regulate blood vessel development (*APOD*, *ANGPTL7*, *NOTCH3*), were  
307 significantly enriched in HNTs compared with ganglia (**figure 4A, 4B, and online**  
308 **supplemental figure 4A**). In contrast, genes that are expressed by ENCs (*VIP*, *MAP2*)  
309 (**online supplemental figure 2**), genes that regulate neuron projection development  
310 (*GAP43*, *NPY*, *RET*), and genes that regulate ATP metabolism (*ATP1B1*, *ATP5F1A*,  
311 *ATP5F1E*) were significantly down-regulated in HNTs compared with ganglia (**figure**  
312 **4B and online supplemental figure 4A**).

313

314 At the cellular level, we confirmed that HNTs contained significantly increased  
315 numbers of glial cells, *CLDNI*<sup>+</sup> FLCs, and *APOD*<sup>+</sup> FLCs than ganglia while ENCs  
316 were absent in HNTs (**figure 4C**). Notably, *CLDNI*<sup>+</sup> FLCs were detected almost  
317 exclusively in HA colons (**online supplemental figure 1F**). By Immunofluorescence  
318 (IF) imaging, we found that *CLDNI*<sup>+</sup> FLCs wrapped the HNTs and that scattered  
319 *CLDNI*<sup>+</sup> FLCs occurred around some ganglia in the transitional zones between the  
320 HG and HA colons (**figure 4D**). Trajectory analysis suggested that *CLDNI*<sup>+</sup> FLCs  
321 were differentiated from *APOD*<sup>+</sup> FLCs, and that trophocytes (*GREM1*<sup>+</sup> FLCs)<sup>42</sup> were  
322 the common progenitors for both FLCs (**figure 4E and online supplemental figure**  
323 **4B-4C**). Following differentiation, *CLDNI*<sup>+</sup> FLCs lose the capacity for extracellular  
324 matrix organization, but acquire transcriptional programs that promote blood vessel  
325 development, cell-cell adhesion, growth factor responses, cytokine responses and  
326 neuron injury responses (**figure 4E and online supplemental figure 4D-4E**). For  
327 example, apolipoprotein D (encoded by *APOD*) is an injury-associated peripheral

328 neuron regeneration factor<sup>43</sup> and Claudin 1 (encoded by *CLDNI*) is an integral  
329 membrane protein induced at the leaky blood-brain barrier of patients with chronic  
330 stroke<sup>44</sup>.

331

332 Cell-cell interaction analysis suggested that *APOD*<sup>+</sup> FLCs and *CLDNI*<sup>+</sup> FLCs may  
333 promote angiogenesis by expressing *VEGFA*, *PGF*, and *ANGPTL1/2/4* (**figure 4F and**  
334 **online supplemental figure 4F**). IF imaging confirmed that endothelial cells around  
335 the HNTs in HA colons are increased compared with those around the ganglia in HG  
336 and CT colons (**online supplemental figure 4G**). *APOD*<sup>+</sup> FLCs and *CLDNI*<sup>+</sup> FLCs  
337 may also regulate the fate of ENC and glial cells by secreting neuron regeneration  
338 factors, including WNT2B<sup>45 46</sup>, bone morphogenetic proteins (BMPs)<sup>47</sup>, NAMPT<sup>48</sup>,  
339 NGF<sup>49</sup>, insulin-like growth factors (IGFs)<sup>50</sup>, GDF10<sup>51</sup> and FGF7<sup>52</sup> (**figure 4F**). Our  
340 analysis also suggested that ENCs may play a role in the differentiation of *APOD*<sup>+</sup>  
341 FLCs and *CLDNI*<sup>+</sup> FLCs via the FGF1-FGFR1 signalling (**figure 4F**). In addition, we  
342 found that TNFR1 (encoded by *TNFRSF1A*), the receptor for the inflammatory  
343 cytokine TNF- $\alpha$ , was expressed by the *APOD*<sup>+</sup> FLCs and *CLDNI*<sup>+</sup> FLCs (**figure 4F**).

344

345 **Ischemia, inflammation and ENC promote *CLDNI*<sup>+</sup> FLCs development in**  
346 **HSCR.**

347 From the above analysis, we hypothesized that ischemic stress, inflammation and  
348 neuron-fibroblast interactions may promote the differentiation of *CLDNI*<sup>+</sup> FLCs.  
349 Therefore, we established an *in vitro* assay using mouse embryonic fibroblasts  
350 (MEFs). The expression of mouse homologues of *CLDNI*<sup>+</sup> FLCs marker genes (*Cldn1*,  
351 *Apod*, *Ecrge4*, *Entpd2*) were significantly up-regulated when MEFs were cultured  
352 under ischemic conditions (12 hr glucose and oxygen deprivation) in the presence of  
353 TNF- $\alpha$  and FGFR1 ligand (FGF-basic) (**figure 4G**).

354

355 To validate these findings *in vivo*, we established a HSCR model of neonatal ischemic  
356 enterocolitis (NIE) using C57BL/6 mice (**online supplemental figure 5A-5F**).  
357 Similar to HSCR patients, we found that NIE mice had a C10-like muscular layer  
358 (TNF- $\alpha$ <sup>+</sup> and CCL2<sup>+</sup>) (**online supplemental figure 5G**), HNTs (**online supplemental**  
359 **figure 5H**), and peri-ganglia *CLDNI* expression (**figure 4H**). To further confirm the  
360 requirement of neuron-derived signals for *CLDNI*<sup>+</sup> FLCs differentiation, we studied  
361 *Sox10*<sup>WT/MUT</sup> C3H mice, which are known to have defective ENCC migration to the

362 distal colon<sup>53</sup> (**online supplemental figure 6A-6G**). CLDN1 was detected in the  
363 peri-ganglionic regions of the *Sox10*<sup>WT/MUT</sup> NIE mice but not in the *Sox10*<sup>WT/MUT</sup>  
364 control mice (**figure 4H**). Consistent with the requirement of neuron-derived signals,  
365 peri-ganglia CLDN1 and HNTs were absent in the aganglionic colons in the neonatal  
366 *Sox10*<sup>WT/MUT</sup> mice (**figure 4H and online supplemental figure 6C**).

367

368 Altogether, our results suggest that ischemic stress promotes *CLDN1*<sup>+</sup>FLC  
369 differentiation and HNT formation independently of ENCC migration defects.

370

371 **Ischemia and inflammation promote *CLDN1*<sup>+</sup>FLCs and HNT formation in**  
372 **patients with Crohn's disease.**

373 As ischemia is found in many inflammatory diseases of the intestine, we  
374 foreshadowed that HNT-related findings for HSCR might also occur these other  
375 diseases. Patients with Crohn's disease (CD) have chronic and relapsing intestinal  
376 inflammation and ischemia<sup>54-57</sup>. To determine whether the mechanism we showed  
377 above may also regulate ENCs in CD, we examined surgical biopsies. We found that  
378 scattered CLDN1 nearby ganglia and CLDN1-wrapped HNTs are also extensively  
379 present in CD colons (**figure 4I**).

380

381 **Ischemia induces ENC death in HSCR.**

382 To determine whether ischemia also contributes to the loss of ENCs in HSCR, we  
383 examined the ganglia (C12). A subgroup of inflammatory muscular ganglia  
384 (iMus\_ganglia) was identified in 3 of 7 HSCR patients (**figure 5A-5D**). Compared  
385 with the noninflammatory muscular ganglia (nMus\_ganglia), the iMus\_ganglia  
386 upregulated the expression of inflammatory cytokines (*TNF*, *CCL2*), displayed  
387 increased response to zinc ions, and downregulated the activity of synaptic  
388 transmission (**figure 5E**). Gene set score analysis showed that neuron apoptosis  
389 pathway was significantly increased in the iMus\_ganglia compared with the  
390 nMus\_ganglia (**figure 5F**). Analysis of bulk RNA-seq data confirmed the increased  
391 apoptosis score in HSCR compared with control subjects (**figure 5G**). By fluorescent  
392 imaging, we confirmed that zinc ion and zinc ion response proteins (SLC30A1 and  
393 MT1A) were significantly increased in the ENCs in HG compared with the control  
394 colons (**figure 5H-5J**). Furthermore, TNF- $\alpha$  and cleaved CASP3 (the apoptosis  
395 executor protein) were significantly increased in ENCs of the HG colon compared

396 with the control colon (**figure 5K and 5L**). Similarly, in the NIE mice, we also  
397 observed significantly increased CASP3 cleavage, mitochondrial cristae breakage,  
398 mitochondrial swelling, and nuclear deformation in the ENCs compared with the  
399 control ENCs (**online supplemental figure 5I and 5J**).

400

401 To confirm that ischemia regulates ENC fate, we treated a human neuron cell line  
402 (SH-SY5Y) under ischemic conditions (6 hr glucose and oxygen deprivation). For  
403 SH-SY5Y cells, ischemia treatment significantly increased the expression of *TNF* and  
404 *CCL2*, promoted cellular zinc accumulation, mitochondria depolarization, and  
405 apoptosis (**figure 6A-6C**). Transmission electron microscope (TEM) revealed that  
406 ischemia-induced neuron apoptosis was associated with cytoplasmic shrinkage,  
407 membrane blebbing, mitochondrial damage and apoptotic body formation in  
408 SH-SY5Y cells (**figure 6D**). Previously, ischemia has been shown to induce zinc ion  
409 accumulation and mitochondria damage<sup>58 59</sup>. We confirmed that zinc ion chelation  
410 (TPEN), CASP3/8 inhibition, and ddC-mediated mitochondria DNA depletion<sup>60</sup>  
411 significantly prevented SH-SY5Y from ischemia-induced apoptosis (**figure 6B and**  
412 **online supplemental figure 7A-7F**).

413

414 **Nitric oxide ameliorates ischemia-induced ENC death in NIE mice.**

415 Nitric oxide (NO) inhibits platelet activation and promotes vasodilation<sup>61</sup>. Recently,  
416 we showed that NO also promotes removal of damaged mitochondria by inducing  
417 mitophagy<sup>62</sup>. Synthesis of nitric oxide is limited under ischemic conditions due to  
418 oxygen deprivation. In SH-SY5Y cells, we confirmed that ischemia decreased NO  
419 levels (**figure 6E**). In patients with HSCR, we also found that NO levels were  
420 significantly decreased in the ganglia and vascular walls of HG colons compared with  
421 the control subjects (**figure 6F**).

422

423 To investigate whether NO may prevent cell death by promoting mitophagy, we  
424 treated SH-SY5Y cells with sodium nitroprusside (SNP), a clinically available NO  
425 donor drug. SNP significantly increased cellular NO concentrations and mitophagy  
426 (LC3 colocalization with mitochondria) (**figure 6E, 6G, and online supplemental**  
427 **figure 7G**). SNP also decreased inflammation, zinc ion accumulation, mitochondrial  
428 depolarization, and cell death in SH-SY5Y cells during ischemia (**figure 6A-6C, 6H,**  
429 **and online supplemental figure 7G**). The effects of SNP on ischemic SH-SY5Y

430 cells were diminished under ddC treatment (**online supplemental figure 7D-7F**),  
431 confirming the major contribution of mitochondria. In contrast, inhibiting neuronal  
432 NO synthase activity by nitroarginine (N $\omega$ ) increased the apoptotic effects of ischemia  
433 (**figure 6C**). It should be mentioned that directly activating cGMP, another  
434 downstream effector molecule of NO<sup>61 63</sup>, only marginally alleviated SH-SY5Y cell  
435 death under ischemic conditions (**online supplemental figure 7H-7J**). To evaluate  
436 the therapeutic effects of the NO donor drug *in vivo*, we treated the NIE mice with  
437 SNP. SNP promoted neonatal growth and prevented ENC loss in the NIE model  
438 (**figure 6I and online supplemental figure 5K-5M**).

439

## 440 **DISCUSSION**

441 In this study, we generated single-cell and spatial transcriptomes for the ganglionic  
442 and aganglionic colons of infants with HSCR. Analysis of a muscular-associated C10  
443 cluster that present exclusively in HSCR infants reveal extensive ischemia-related  
444 stress responses in HSCR. The intestinal vasculatures were clogged by aggregated  
445 platelets and collagen. Ischemia, inflammation and neuron-derived signals promote  
446 the differentiation of *CLDN1*<sup>+</sup>FLCs, which lie at the periphery of the HNTs and  
447 support neuron regeneration and angiogenesis. However, under persistent oxygen  
448 deprivation, NO becomes a limiting factor for the ENCs, which succumb to  
449 mitochondria damage, neuron inflammation and Caspase-mediated apoptosis. Finally,  
450 the pathophysiological significance of ischemia-related neuropathy in HSCR was  
451 confirmed by the amelioration of neuron death *in vitro* and in the NIE mouse model of  
452 human HSCR *in vivo* by SNP, a NO donor drug.

453

454 Defective ENCC migration has been suggested as the underlying cause of HSCR<sup>5 64 65</sup>.  
455 This is consistent with the fact that most HSCR patients in our cohort presented  
456 symptoms (delayed meconium passage) immediately after birth. However, glial cells  
457 derived from ENCCs<sup>3</sup> are broadly present in most of the HA colons<sup>11 12</sup>, which  
458 indicates success colonization of ENCCs in the patients. Interestingly, glial  
459 cell-containing HNTs are absent in HSCR patients whose entire colons are  
460 aganglionic<sup>66 67</sup>. Consistent with the above clinical observations, glial cells and HNTs  
461 are absent in the aganglionic colons in *Sox10*<sup>WT/MUT</sup> mice, which are known to have  
462 ENCC migration defects<sup>53</sup>. By analyzing colonic tissues of sporadic HSCR infants,  
463 we show for the first time that ischemia contributes to ENC loss in HSCR colons.

464 Using *Sox10*<sup>WT/MUT</sup> NIE model, we demonstrate that only in the presence of  
465 neuron-derived signals, ischemia promotes the formation of CLDN1-wrapped HNTs.  
466 Given that intestinal obstruction leads to intestinal ischemia<sup>68</sup>, our results support a  
467 pathophysiological cascade of HSCR development, which may involve obstruction,  
468 ischemia, selective loss of ENCs in ganglionic colons, and elongation of aganglionic  
469 colons.

470

471 Our findings highlight the importance of preventing ischemia-related ENC loss in  
472 infants with HSCR. As a vasodilator and an inhibitor of platelet activation, NO has  
473 been used to treat ischemia for decades<sup>61</sup>. Moreover, our previous work had identified  
474 a novel function of NO, which removes damaged mitochondria by inducing  
475 mitophagy<sup>62</sup>. By culturing a neuron cell line under ischemic conditions, we observed  
476 significantly increased mitochondria depolarization, mitochondria damage and  
477 caspase-dependent neuron cell death. The therapeutic effects of NO donors as  
478 candidate treatments for HSCR are supported by SNP restoring neonatal growth and  
479 preventing ENC loss in the NIE model. Altogether, our study reveals that  
480 ischemia-induced postnatal ENC loss is a novel pathogenic mechanism of HSCR, and  
481 suggest that NO donor drugs may be useful in treating ischemia-related ENC death.

482

483

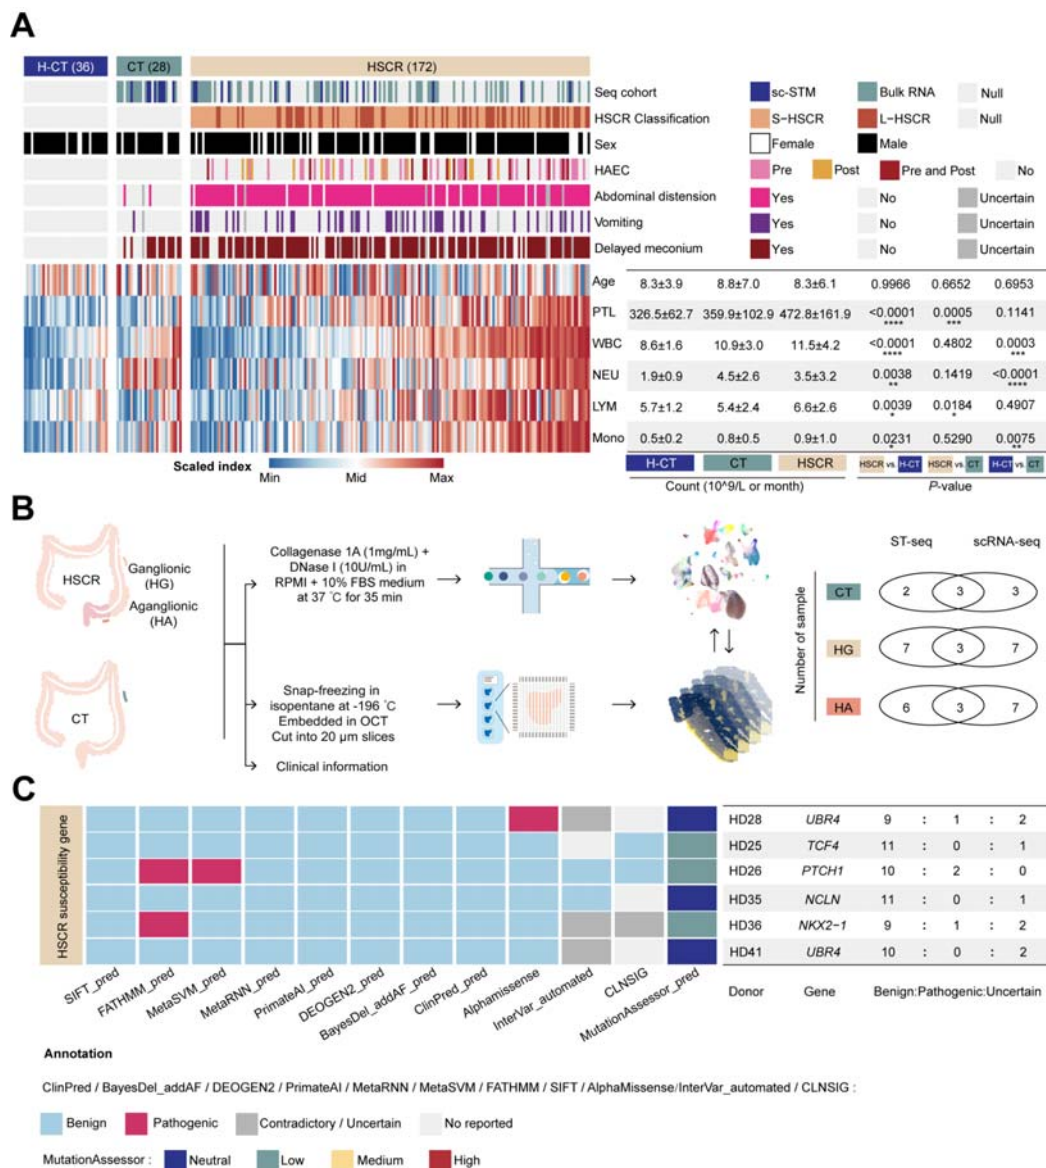

484 **Figure 1. Cohort characterization.**

485 (A) 36 age-matched healthy donors (H-CT), 28 anorectal malformations patients (CT) and 172  
 486 sporadic HSCR patients were recruited in this study. Heatmap displaying clinical information  
 487 recorded on the electric medical records. Among these donors, scRNA-seq and ST-seq were  
 488 applied to colonic tissues from eight CT and 14 HSCR subjects, bulk RNA-seq was applied to  
 489 colonic tissues from a different set of 13 CT and 59 HSCR donors (HG=53, HA=54; 48 HG-HA  
 490 pairs). The mean, standard deviation (SD), and *P* value were shown in the table. Two-tailed *t*-test.  
 491 \*\*\*\* *P* < 0.0001, \*\*\**P* < 0.001, \*\**P* < 0.01, \**P* < 0.05. S-HSCR, short segment HSCR. L-HSCR,  
 492 long segment HSCR. Delayed meconium, inability to pass meconium within the first 48 hours of  
 493 life. PTL, blood platelet counts. WBC, blood white blood cell counts. NEU, blood neutrophil  
 494 counts. LYM, blood lymphocyte count. Mono, blood monocyte counts. Colors were used to show



495 the normalized order of specific parameter values.

496 **(B)** Workflow for sample collection and data analysis. Sample numbers are indicated.

497 **(C)** Grid plot showing rare genetic variants of known susceptibility genes detected in 14 HSCR

498 patients applied with scRNA-seq and ST-seq. Each row represents a variant. All variants are

499 heterozygous single nucleotide variants with a total allele frequency (according to dbSNP) less

500 than 1%. 12 databases were used to annotate these variants.

501

502

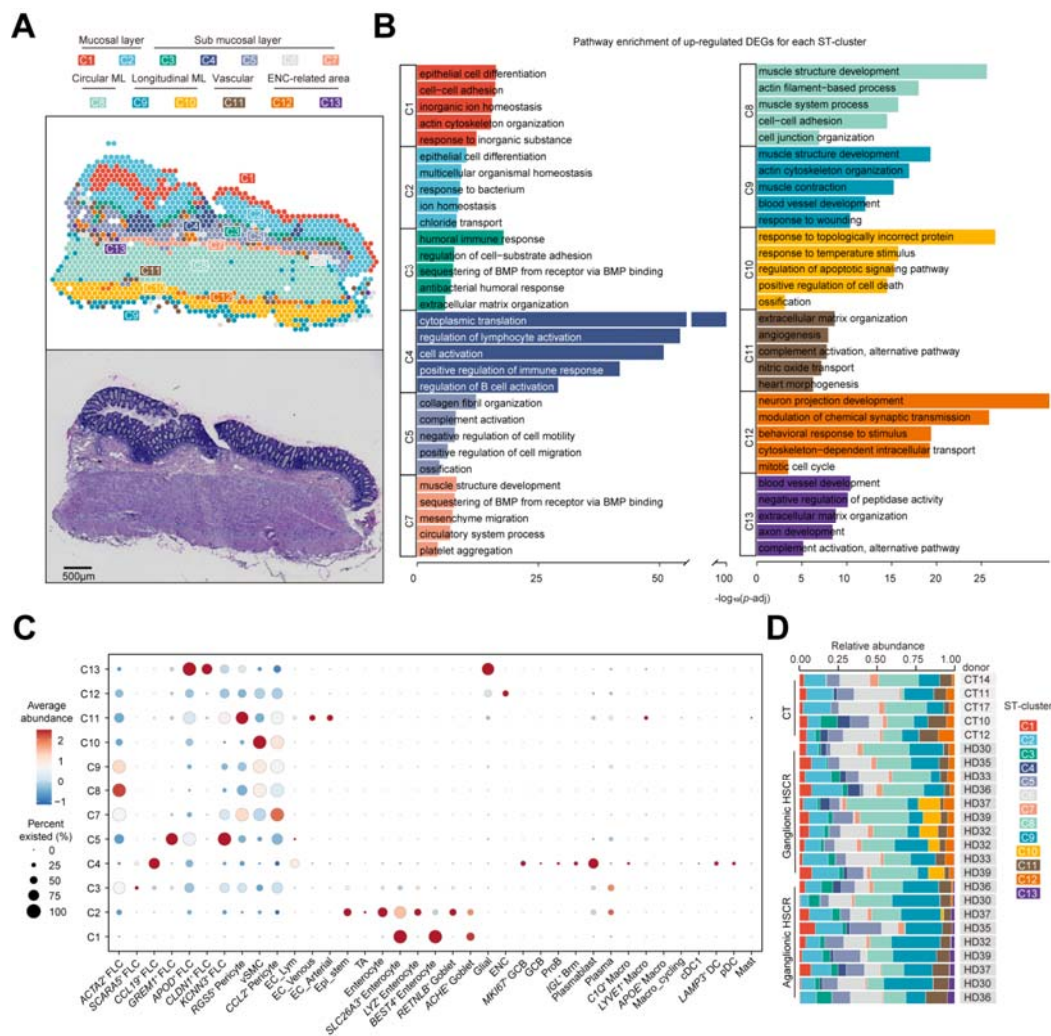

503 **Figure 2.** Single-cell and spatial transcriptome profiling of HSCR and control subjects.  
 504 (A) Distribution of 13 spatial transcriptome (ST) clusters (C1-C13) in a representative ST slide.  
 505 (B) Bar plot displaying pathways enriched in up-regulated DEGs of each ST cluster.  
 506 (C) Heatmap showing abundances of scRNA-seq subsets on ST-clusters. Color represents  
 507 center-normalized relative abundance. The size of dots represents the fraction of ST-spots  
 508 containing corresponding cells.  
 509 (D) Bar plot showing the relative abundance of ST clusters for control and HSCR subjects.  
 510

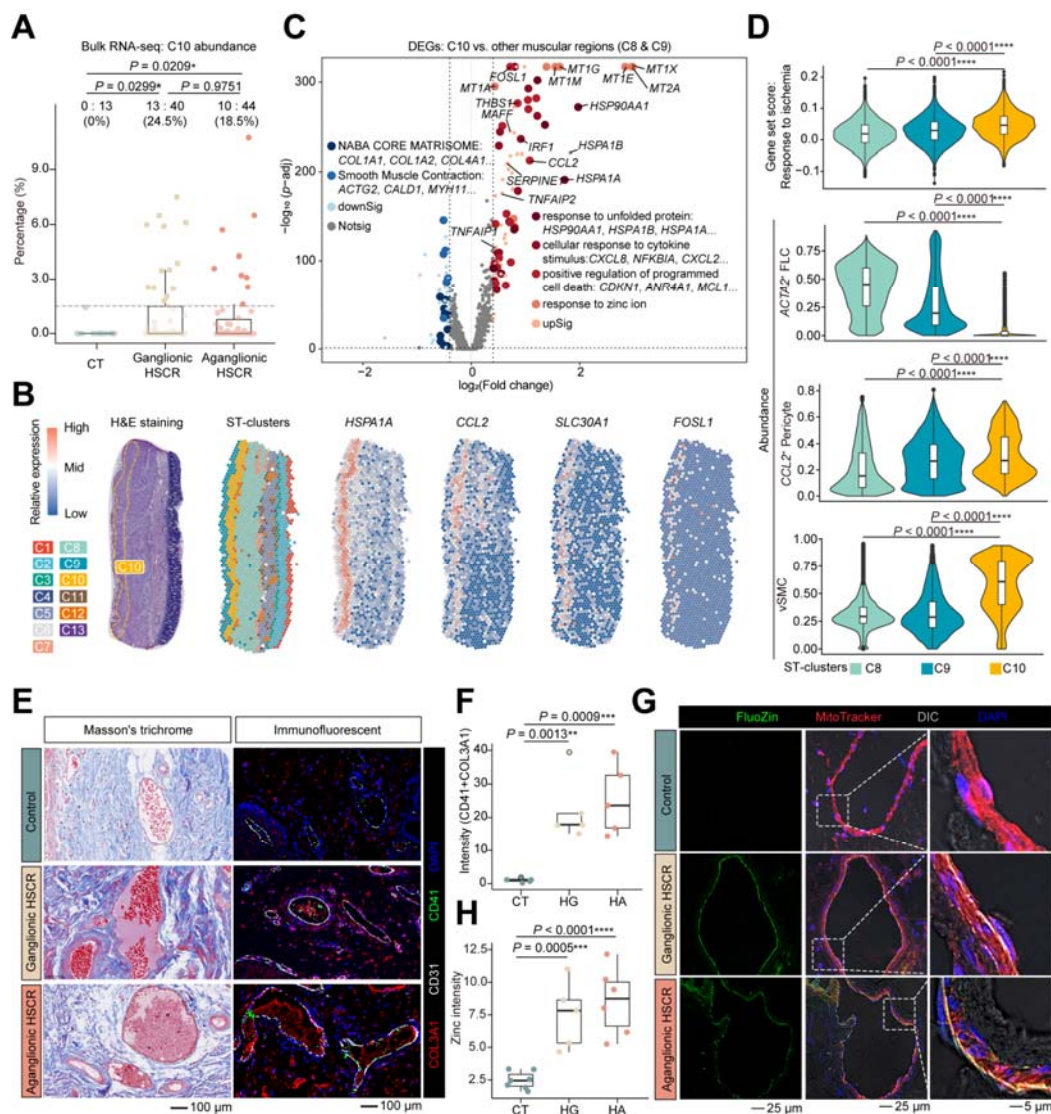

511

512 **Figure 3.** Ischemic stress in HSCR colons.

513 (A) Box plot showing the abundance of C10 imputed by CIBERSORT in bulk RNA-seq data. The  
 514 percentage of HG and HA samples with a C10 abundance higher than the confidence limit (1.5%)  
 515 was marked.

516 (B) The expression of selected genes on a representative slide of HG colon.

517 (C) Volcano plot showing DEGs in the comparison between C10 and the rest of the muscular  
 518 ST-clusters (C8 and C9). DEGs of selected pathways were indicated as colored bold spots.

519 (D) Violin-box plot showing gene set score (response to ischemia, GO: 0002931) and the  
 520 abundance of single-cell populations in the muscular ST-clusters.

521 (E-F) Masson's trichrome and immunofluorescence imaging (E), and box plot (F) showing platelet  
 522 and collagen aggregates in the colonic blood vessels (five donors for each group).

523 (G-H) Zinc ion (Fluozin) and mitochondria (MitoTracker) staining (G) and box plot (H) showing  
524 the concentration of zinc ion in the colonic vasculatures (seven CT, five HG, and six HA subjects).  
525 Each datapoint in the same group represents a donor (A, F, H). For boxplots, line within box  
526 represents the median; the box limit represents the SD, the whiskers represent the  $1.5 \times$  outliers (A,  
527 D, F, H). Statistical significance was determined using two-sided Mann-Whitney U test (A, D) or  
528 two-tailed *t*-test (F, H). \*\*\*\* $P < 0.0001$ , \*\*\* $P < 0.001$ , \*\* $P < 0.01$ , \* $P < 0.05$ .  
529

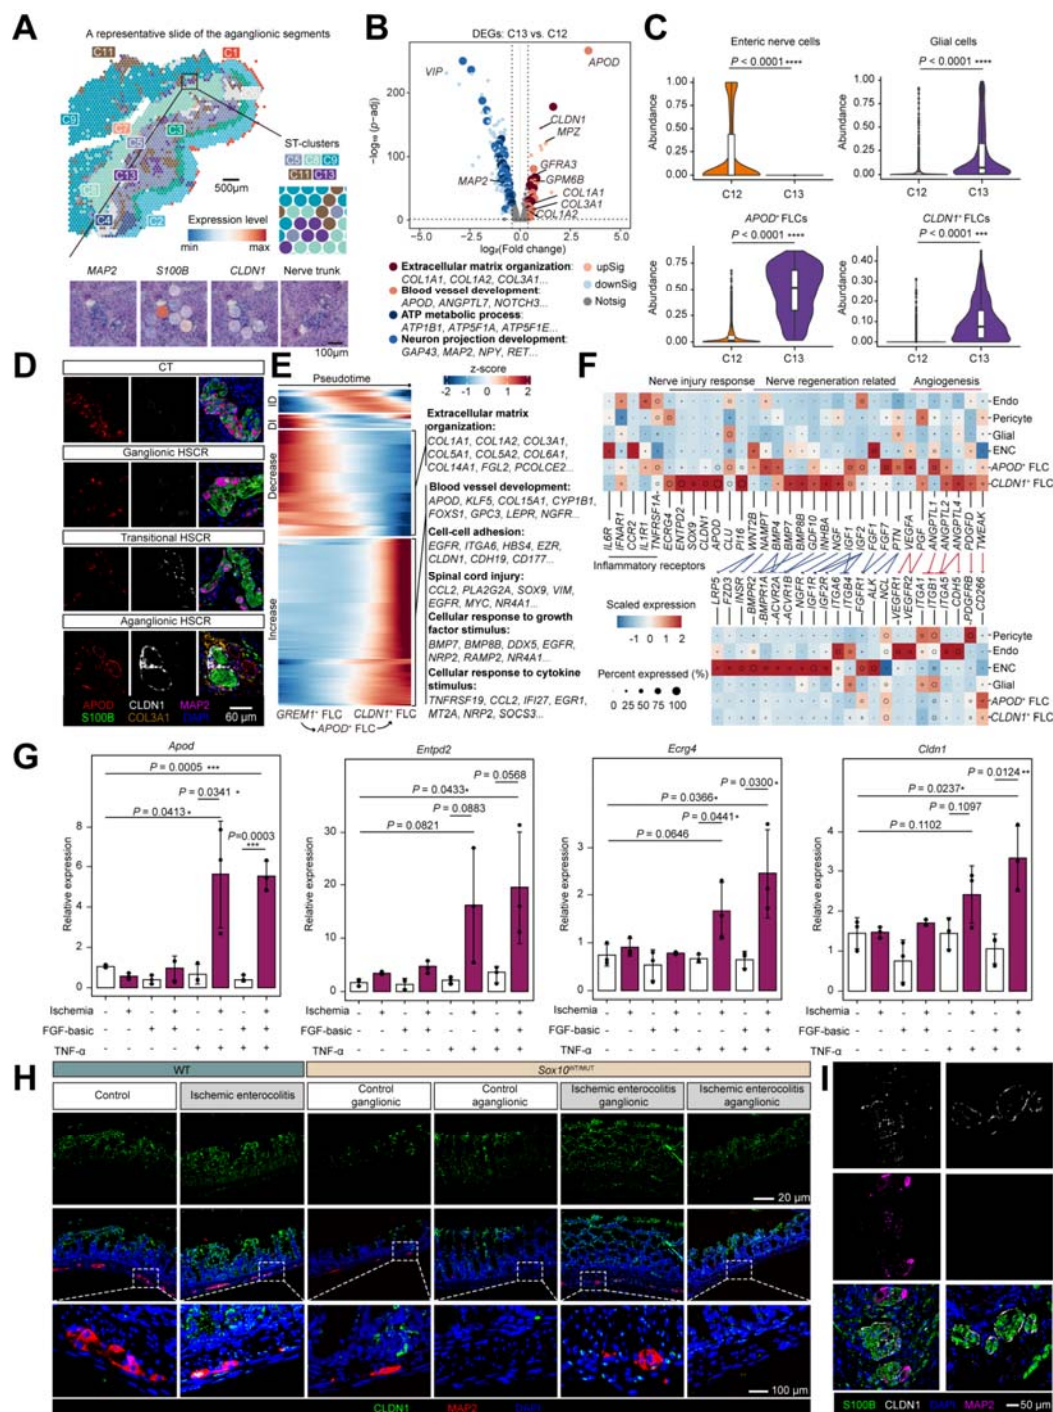

530

531 **Figure 4.** Ischemic stress, FGF and TNF- $\alpha$  induce peri-neural and peri-HNT *CLDN1*<sup>+</sup> FLCs.

532 (A) A spatial map displaying ST clusters (upper panel) and expression of selected genes in HA  
533 colons (lower panel). Normalized expression levels were presented by color.

534 (B) Volcano plot displaying the DEGs between ganglia (C12) and HNTs (C13). DEGs of selected  
535 pathways were marked with bold spots.

536 (C) Violin-box plot showing the abundance of scRNA-seq subsets in ganglia and HNTs,  
537 respectively. Two-sided Mann–Whitney U test. Data are median (line within the box) with a SD  
538 (box limit) and  $1.5 \times$  outliers (whiskers).

539 (D) IF imaging (six donors for each group) showing compositions of ganglia and HNTs in control  
540 and HSCR colons.

541 (E) Heatmap displaying transcriptional changes during the differentiation of indicated FLCs.

542 (F) Heatmap showing the expression of selected ligands and receptors in scRNA-seq defined  
543 subsets. Color represents center-normalized gene expression level. The size of dots represents the  
544 fraction of cells expressing corresponding genes. Ligand-receptor pairs were linked by arrows.

545 (G) Bar plot showing the relative expression of *CLDN1*<sup>+</sup>FLC marker genes in MEFs that were  
546 cultured under indicated conditions. Three biological replicates are expressed as mean  $\pm$  SD.  
547 Two-tailed *t*-test. Each data point represents an independent assay. \*\*\* $P < 0.001$ , \*\* $P < 0.01$ , \* $P <$   
548  $0.05$ .

549 (H) IF imaging (five animals for each group) showing CLDN1 and MAP2 staining in wild type  
550 (WT) and *Sox10*<sup>WT/MUT</sup> mice under indicated conditions.

551 (I) IF imaging (representative results from three donors) displaying HNT-like structures in the  
552 colons of patients with Crohn's disease.

553

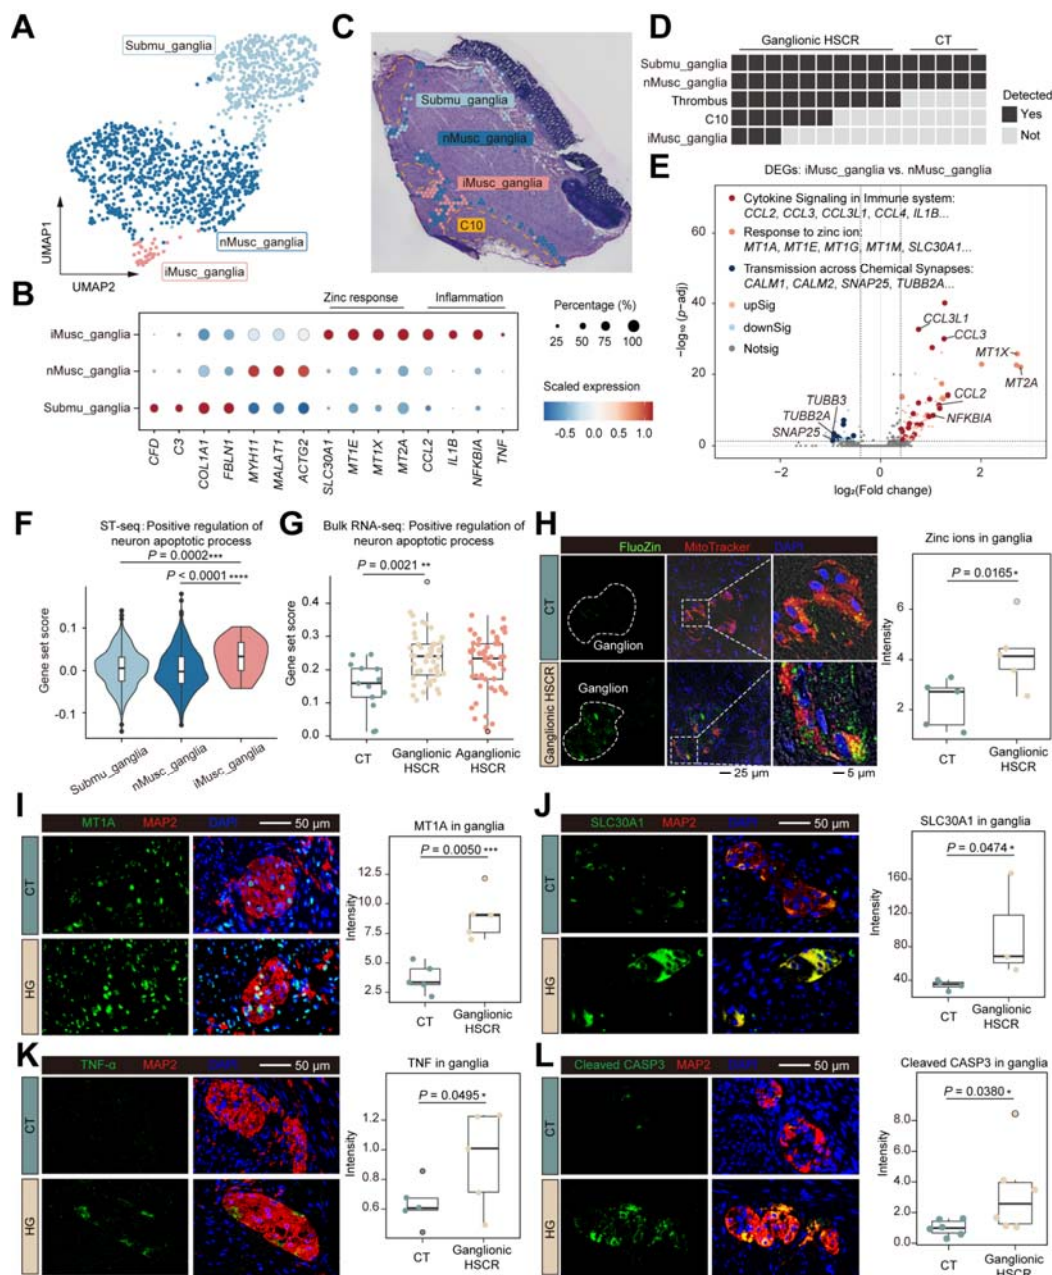

554

555 **Figure 5.** Neuroinflammation and apoptosis in HSCR colons.

556 (A) UMAP plot showing the C12 (ganglia) sub-clusters. Submu\_ganglia, ST-spots that mainly  
 557 cover ganglia in submucosa region. nMusc\_ganglia, ST-spots that mainly cover non-inflamed  
 558 ganglia in muscular region. iMusc\_ganglia, ST-spots that mainly cover inflammatory ganglia in  
 559 muscular region.

560 (B) Heatmap displaying the expression of marker genes for ganglia sub-clusters. The colors  
 561 represent the center-normalized relative expression levels of genes. The size of dots represents the  
 562 fraction of ST-spots expressing corresponding genes.

563 (C) An H&E slide from an HG colon showing the location of the ganglia sub-clusters.  
564 (D) Grid plot showing co-appearance of C10 and ganglia sub-clusters in HSCR. Each square  
565 represents a ST-seq sample.  
566 (E) Volcano plot showing DEGs of the comparison between nMusc\_ganglia and iMusc\_ganglia.  
567 DEGs of the selected pathways were marked with colored thick spots.  
568 (F) Violin-box plot showing the gene set score (GO: 0043525, positive regulation of neuron  
569 apoptotic process) in ganglia sub-clusters.  
570 (G) Box plot showing the gene set score (GO: 0043525, positive regulation of neuron apoptotic  
571 process) in bulk RNA-seq.  
572 (H-L) Fluorescence imaging and boxplot displaying zinc ion, MT1A, SLC30A1, TNF- $\alpha$ , and  
573 cleaved CASP3 in the ganglia from control and HSCR subjects.  
574 Data are median (line within the box) with a SD (box limit) and  $1.5 \times$  outliers (whiskers) (F-L).  
575 Statistical analysis was performed using two-sided Mann-Whitney U test (F-G) or one-tailed *t*-test  
576 (I-L). \*\*\*\* $P < 0.0001$ , \*\*\* $P < 0.001$ , \*\* $P < 0.01$ , \* $P < 0.05$ . Each datapoint within the same  
577 group represents a donor (G-L). Representative fluorescence images were generated of slides of  
578 the same number of donors shown in the boxplot (H, I, K: five HSCR and five CT; J: three HSCR  
579 and four CT; L: six HSCR and six CT).  
580



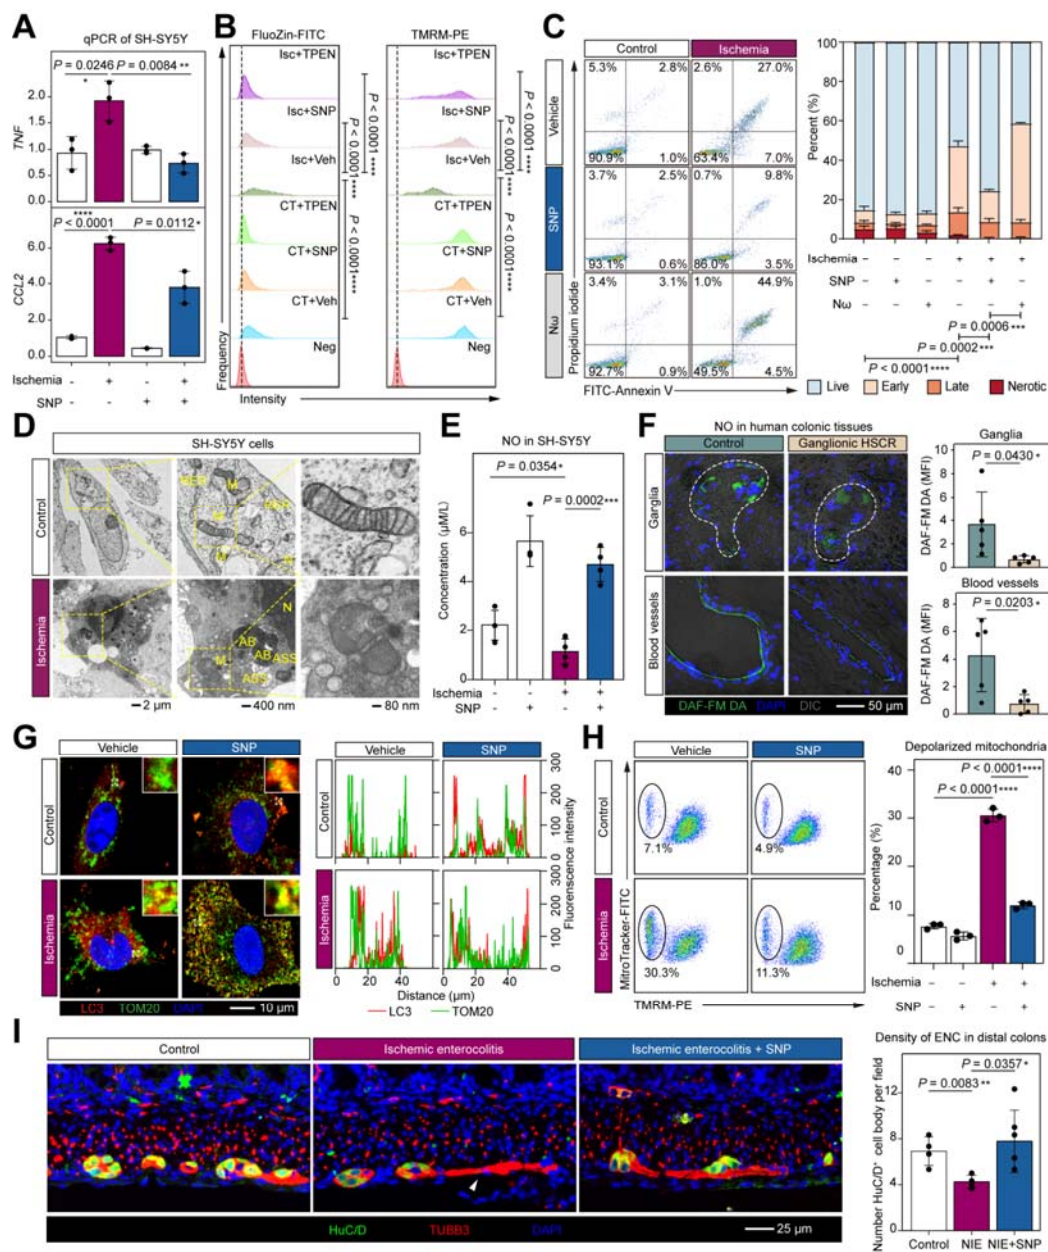

581

582 **Figure 6.** Nitric oxide prevents ischemia-induced enteric neuron cell death.

583 (A) Bar plot showing the expression of *TNF* and *CCL2* in SH-SY5Y cells under the indicated  
584 conditions. SNP, sodium nitroprusside, a NO donor drug.

585 (B) Frequency plot displaying the changes of intracellular free zinc ions (left panel) and  
586 mitochondrial membrane potential (right panel) in SH-SY5Y cells under the indicated conditions.  
587 Veh, vehicle (DMSO). TPEN, a zinc ion chelating agent. Neg, negative control. Isc, ischemia. CT,  
588 control condition. FluoZin, a zinc ion fluorescent dye. TMRM, a mitochondrial membrane  
589 potential indicator.

590 (C) Scatter plot and bar plot displaying the types of cell death under indicated conditions detected

591 by flow cytometry. N $\omega$ , an nNOS inhibitor. Early apoptotic (Annexin V<sup>+</sup>PI), late apoptotic  
592 (Annexin V<sup>+</sup>PI), necrotic (Annexin V<sup>+</sup>PI<sup>+</sup>).

593 **(D)** TEM showing the structures of nuclei (N), mitochondria (M), apoptotic bodies (ABs), rough  
594 endoplasmic reticulum (RER), and autolysosome (ASSs) of SH-SY5Y cells under the indicated  
595 conditions.

596 **(E)** Bar plot displaying the changes of NO levels in SH-SY5Y cell under indicated treatments.

597 **(F)** Fluorescence imaging and bar plot showing the NO levels in the blood vessels and ganglia of  
598 HG and control colons. Slides are from five donors for each group. DAF-FM DA, a reagent that  
599 detect nitric oxide. MFI, mean fluorescence intensity.

600 **(G)** IF imaging and frequency plot showing the mitophagy in SH-SY5Y cell under indicated  
601 treatments. TOM20 represents mitochondria. LC3B, a marker of autophagic activity.

602 **(H)** Scatter plot and bar plot displaying the changes of mitochondrial membrane potential in  
603 SH-SY5Y cell under indicated treatment.

604 **(I)** IF imaging and bar plot showing the density of ENC body in the distal colons of control (four  
605 animals), NIE (four animals), and NIE+SNP mouse (six animals). NIE+SNP, NIE mouse treated  
606 with SNP (5 mg/kg).

607 Data are mean  $\pm$  SD, each datapoint represents an assay (**A, E, H**), a donor (**F**) or an animal (**I**).

608 Statistical analysis was performed using two-tailed *t*-test (**A-C, E, F, H, I**). \*\*\*\**P* < 0.0001, \*\*\**P*  
609 < 0.001, \*\**P* < 0.01, \**P* < 0.05. n= three (**A-D, F-H**) or four (**E**) independent experiments.

610 **Acknowledgements** We thank all the donors and their parents for their consent and  
611 participation in this study.

612

613 **Contributors** Yuxia Z. and Yan Z. conceived the study and designed the experiments.  
614 Yuxia Z., Yan Z., F.B., and H.X. supervised the study. Yuxia Z., D.X., and W.L. wrote  
615 the manuscript with significant input from A.M.L., F.B., and Yan Z. D.X. performed  
616 the scRNA-seq, ST-seq, developed all code and analyzed the sequencing data. W.L.  
617 performed *in vitro* and *in vivo* experiments with assistance from L.L., Weiyong Z.,  
618 M.Y., and C.L. W.L. analyzed the data generated from *in vivo* and *in vitro* experiment.  
619 C.L. collected and analyzed the clinical information with the assistance from Weiyong  
620 Z. and X.Z. Wenhuan Z., Q.W., Wei Z., and J.Z. recruited and provided patient care  
621 and clinical and histological assessments. All authors discussed and approved the  
622 manuscript.

623

624 **Funding** This project was jointly supported by the National Natural Science  
625 Foundation of China (82125015 to Yuxia.Z., 81970450 to Yan.Z., 82100582 to W.L.),  
626 China Postdoctoral Science Foundation (2021TQ0083 to W.L.), Science and  
627 Technology Planning Project of Guangdong Province (2019B020227001 to H.X.),  
628 Guangdong Basic and Applied Basic Research Foundation (2021A1515220146 to  
629 Yan.Z.), and Guangzhou Basic Research Plan City School (Institute) Enterprise Joint  
630 Funding Project (SL2024A03J01 to Yan.Z.)

631

632 **Competing interests** The authors declare no competing interests.

633

634 **Data availability statement** The sequencing data involved in this study were  
635 deposited at the Genome Sequence Archive of Beijing Institute of Genomics, Chinese  
636 Academy of Sciences (GSA-Human accession: HRA006505). Data acquisition  
637 follows the guidelines of Genome Sequence Archive  
638 (<http://bigd.big.ac.cn/gsa-human>). All codes and resource data were available upon  
639 reasonable request to the authors

640

641

642

643

644

645 **References:**

646

- 647 1. Rao M, Gershon MD. The bowel and beyond: the enteric nervous system in neurological disorders.  
648 *Nat Rev Gastroenterol Hepatol* 2016;13(9):517-28. doi: 10.1038/nrgastro.2016.107 [published  
649 Online First: 2016/07/21]
- 650 2. Browning KN, Verheijden S, Boeckxstaens GE. The Vagus Nerve in Appetite Regulation, Mood, and  
651 Intestinal Inflammation. *Gastroenterology* 2017;152(4):730-44. doi:  
652 10.1053/j.gastro.2016.10.046 [published Online First: 20161215]
- 653 3. Boesmans W, Nash A, Tasnady KR, et al. Development, Diversity, and Neurogenic Capacity of  
654 Enteric Glia. *Front Cell Dev Biol* 2021;9:775102. doi: 10.3389/fcell.2021.775102 [published  
655 Online First: 20220117]
- 656 4. Montalva L, Cheng LS, Kapur R, et al. Hirschsprung disease. *Nat Rev Dis Primers* 2023;9(1):54. doi:  
657 10.1038/s41572-023-00465-y [published Online First: 2023/10/13]
- 658 5. Amiel J, Sproat-Emison E, Garcia-Barcelo M, et al. Hirschsprung disease, associated syndromes and  
659 genetics: a review. *J Med Genet* 2008;45(1):1-14. doi: 10.1136/jmg.2007.053959 [published  
660 Online First: 2007/10/30]
- 661 6. Gabriel SB, Salomon R, Pelet A, et al. Segregation at three loci explains familial and population risk  
662 in Hirschsprung disease. *Nat Genet* 2002;31(1):89-93. doi: 10.1038/ng868 [published Online  
663 First: 20020415]
- 664 7. Chatterjee S, Karasaki KM, Fries LE, et al. A multi-enhancer RET regulatory code is disrupted in  
665 Hirschsprung disease. *Genome Res* 2021;31(12):2199-208. doi: 10.1101/gr.275667.121  
666 [published Online First: 20211115]
- 667 8. Uribe RA, Hong SS, Bronner ME. Retinoic acid temporally orchestrates colonization of the gut by  
668 vagal neural crest cells. *Dev Biol* 2018;433(1):17-32. doi: 10.1016/j.ydbio.2017.10.021  
669 [published Online First: 20171103]
- 670 9. Frith TJR, Gogolou A, Hackland JOS, et al. Retinoic Acid Accelerates the Specification of Enteric  
671 Neural Progenitors from In-Vitro-Derived Neural Crest. *Stem Cell Reports* 2020;15(3):557-65.  
672 doi: 10.1016/j.stemcr.2020.07.024 [published Online First: 2020/08/29]
- 673 10. Vincent E, Chatterjee S, Cannon GH, et al. Ret deficiency decreases neural crest progenitor  
674 proliferation and restricts fate potential during enteric nervous system development. *Proc Natl  
675 Acad Sci U S A* 2023;120(34):e2211986120. doi: 10.1073/pnas.2211986120 [published Online  
676 First: 2023/08/16]
- 677 11. Monforte-Munoz H, Gonzalez-Gomez I, Rowland JM, et al. Increased submucosal nerve trunk  
678 caliber in aganglionosis: a "positive" and objective finding in suction biopsies and segmental  
679 resections in Hirschsprung's disease. *Arch Pathol Lab Med* 1998;122(8):721-5.
- 680 12. Tani G, Tomuschat C, O'Donnell AM, et al. Increased population of immature enteric glial cells in  
681 the resected proximal ganglionic bowel of Hirschsprung's disease patients. *J Surg Res*  
682 2017;218:150-55. doi: 10.1016/j.jss.2017.05.062 [published Online First: 2017/10/08]
- 683 13. Zhou Y, Yang J, Watkins DJ, et al. Enteric nervous system abnormalities are present in human  
684 necrotizing enterocolitis: potential neurotransplantation therapy. *Stem Cell Res Ther*  
685 2013;4(6):157. doi: 10.1186/scrt387 [published Online First: 2014/01/16]
- 686 14. Vasina V, Barbara G, Talamonti L, et al. Enteric neuroplasticity evoked by inflammation. *Auton  
687 Neurosci* 2006;126-127:264-72. doi: 10.1016/j.autneu.2006.02.025 [published Online First:  
688 2006/04/21]

- 689 15. Holland AM, Bon-Frauches AC, Keszthelyi D, et al. The enteric nervous system in gastrointestinal  
690 disease etiology. *Cell Mol Life Sci* 2021;78(10):4713-33. doi: 10.1007/s00018-021-03812-y  
691 [published Online First: 2021/03/27]
- 692 16. Khoury-Hanold W, Yordy B, Kong P, et al. Viral Spread to Enteric Neurons Links Genital HSV-1  
693 Infection to Toxic Megacolon and Lethality. *Cell Host Microbe* 2016;19(6):788-99. doi:  
694 10.1016/j.chom.2016.05.008 [published Online First: 2016/06/10]
- 695 17. Elmentaite R, Kumasaka N, Roberts K, et al. Cells of the human intestinal tract mapped across  
696 space and time. *Nature* 2021;597(7875):250-55. doi: 10.1038/s41586-021-03852-1 [published  
697 Online First: 2021/09/10]
- 698 18. Li Z, Lui KN, Lau ST, et al. Transcriptomics of Hirschsprung disease patient-derived enteric neural  
699 crest cells reveals a role for oxidative phosphorylation. *Nat Commun* 2023;14(1):2157. doi:  
700 10.1038/s41467-023-37928-5 [published Online First: 2023/04/16]
- 701 19. Fawcner-Corbett D, Antanaviciute A, Parikh K, et al. Spatiotemporal analysis of human intestinal  
702 development at single-cell resolution. *Cell* 2021 doi: 10.1016/j.cell.2020.12.016 [published  
703 Online First: 2021/01/07]
- 704 20. Elmentaite R, Ross ADB, Roberts K, et al. Single-Cell Sequencing of Developing Human Gut  
705 Reveals Transcriptional Links to Childhood Crohn's Disease. *Dev Cell* 2020;55(6):771-83 e5.  
706 doi: 10.1016/j.devcel.2020.11.010 [published Online First: 2020/12/09]
- 707 21. Polanski K, Young MD, Miao Z, et al. BBKNN: fast batch alignment of single cell transcriptomes.  
708 *Bioinformatics* 2020;36(3):964-65. doi: 10.1093/bioinformatics/btz625 [published Online  
709 First: 2019/08/11]
- 710 22. Wolf FA, Angerer P, Theis FJ. SCANPY: large-scale single-cell gene expression data analysis.  
711 *Genome Biol* 2018;19(1):15. doi: 10.1186/s13059-017-1382-0 [published Online First:  
712 2018/02/08]
- 713 23. Trapnell C, Cacchiarelli D, Grimsby J, et al. The dynamics and regulators of cell fate decisions are  
714 revealed by pseudotemporal ordering of single cells. *Nat Biotechnol* 2014;32(4):381-86. doi:  
715 10.1038/nbt.2859 [published Online First: 2014/03/25]
- 716 24. Qiu X, Mao Q, Tang Y, et al. Reversed graph embedding resolves complex single-cell trajectories.  
717 *Nat Methods* 2017;14(10):979-82. doi: 10.1038/nmeth.4402 [published Online First:  
718 2017/08/22]
- 719 25. Jin S, Guerrero-Juarez CF, Zhang L, et al. Inference and analysis of cell-cell communication using  
720 CellChat. *Nat Commun* 2021;12(1):1088. doi: 10.1038/s41467-021-21246-9 [published  
721 Online First: 2021/02/19]
- 722 26. Hao Y, Hao S, Andersen-Nissen E, et al. Integrated analysis of multimodal single-cell data. *Cell*  
723 2021;184(13):3573-87 e29. doi: 10.1016/j.cell.2021.04.048 [published Online First:  
724 2021/06/02]
- 725 27. Chen S, Zhou Y, Chen Y, et al. fastp: an ultra-fast all-in-one FASTQ preprocessor. *Bioinformatics*  
726 2018;34(17):i884-i90. doi: 10.1093/bioinformatics/bty560 [published Online First:  
727 2018/11/14]
- 728 28. Dobin A, Davis CA, Schlesinger F, et al. STAR: ultrafast universal RNA-seq aligner.  
729 *Bioinformatics* 2013;29(1):15-21. doi: 10.1093/bioinformatics/bts635 [published Online First:  
730 2012/10/25]
- 731 29. Newman AM, Steen CB, Liu CL, et al. Determining cell type abundance and expression from bulk  
732 tissues with digital cytometry. *Nat Biotechnol* 2019;37(7):773-82. doi:

- 733 10.1038/s41587-019-0114-2 [published Online First: 2019/05/08]
- 734 30. Zhou Y, Zhou B, Pache L, et al. Metascape provides a biologist-oriented resource for the analysis of  
735 systems-level datasets. *Nat Commun* 2019;10(1):1523. doi: 10.1038/s41467-019-09234-6  
736 [published Online First: 2019/04/05]
- 737 31. Li H, Durbin R. Fast and accurate long-read alignment with Burrows-Wheeler transform.  
738 *Bioinformatics* 2010;26(5):589-95. doi: 10.1093/bioinformatics/btp698 [published Online  
739 First: 2010/01/19]
- 740 32. Danecek P, Bonfield JK, Liddle J, et al. Twelve years of SAMtools and BCFtools. *Gigascience*  
741 2021;10(2) doi: 10.1093/gigascience/giab008
- 742 33. Institute B. Picard Toolkit: GitHub Repository; 2019 [Available from:  
743 <https://broadinstitute.github.io/picard/>].
- 744 34. McKenna A, Hanna M, Banks E, et al. The Genome Analysis Toolkit: a MapReduce framework for  
745 analyzing next-generation DNA sequencing data. *Genome Res* 2010;20(9):1297-303. doi:  
746 10.1101/gr.107524.110 [published Online First: 2010/07/21]
- 747 35. Wang K, Li M, Hakonarson H. ANNOVAR: functional annotation of genetic variants from  
748 high-throughput sequencing data. *Nucleic Acids Res* 2010;38(16):e164. doi:  
749 10.1093/nar/gkq603 [published Online First: 2010/07/06]
- 750 36. McLaren W, Gil L, Hunt SE, et al. The Ensembl Variant Effect Predictor. *Genome Biol*  
751 2016;17(1):122. doi: 10.1186/s13059-016-0974-4 [published Online First: 2016/06/09]
- 752 37. Drokhlyansky E, Smillie CS, Van Wittenbergh N, et al. The Human and Mouse Enteric Nervous  
753 System at Single-Cell Resolution. *Cell* 2020;182(6):1606-22 e23. doi:  
754 10.1016/j.cell.2020.08.003 [published Online First: 2020/09/06]
- 755 38. Demehri FR, Halaweish IF, Coran AG, et al. Hirschsprung-associated enterocolitis: pathogenesis,  
756 treatment and prevention. *Pediatr Surg Int* 2013;29(9):873-81. doi:  
757 10.1007/s00383-013-3353-1 [published Online First: 2013/08/06]
- 758 39. Kuppe C, Ramirez Flores RO, Li Z, et al. Spatial multi-omic map of human myocardial infarction.  
759 *Nature* 2022;608(7924):766-77. doi: 10.1038/s41586-022-05060-x [published Online First:  
760 20220810]
- 761 40. Ziegler M, Wang X, Peter K. Platelets in cardiac ischaemia/reperfusion injury: a promising  
762 therapeutic target. *Cardiovasc Res* 2019;115(7):1178-88. doi: 10.1093/cvr/cvz070
- 763 41. Ahmed NS, Lopes-Pires M, Pugh N. Zinc: an endogenous and exogenous regulator of platelet  
764 function during hemostasis and thrombosis. *Platelets* 2021;32(7):880-87. doi:  
765 10.1080/09537104.2020.1840540 [published Online First: 20201115]
- 766 42. McCarthy N, Manieri E, Storm EE, et al. Distinct Mesenchymal Cell Populations Generate the  
767 Essential Intestinal BMP Signaling Gradient. *Cell Stem Cell* 2020;26(3):391-402 e5. doi:  
768 10.1016/j.stem.2020.01.008 [published Online First: 20200220]
- 769 43. Ganfornina MD, Do Carmo S, Martinez E, et al. ApoD, a glia-derived apolipoprotein, is required  
770 for peripheral nerve functional integrity and a timely response to injury. *Glia*  
771 2010;58(11):1320-34. doi: 10.1002/glia.21010 [published Online First: 2010/07/08]
- 772 44. Sladojevic N, Stamatovic SM, Johnson AM, et al. Claudin-1-Dependent Destabilization of the  
773 Blood-Brain Barrier in Chronic Stroke. *J Neurosci* 2019;39(4):743-57. doi:  
774 10.1523/JNEUROSCI.1432-18.2018 [published Online First: 20181130]
- 775 45. Kubo F, Takeichi M, Nakagawa S. Wnt2b inhibits differentiation of retinal progenitor cells in the  
776 absence of Notch activity by downregulating the expression of proneural genes. *Development*

- 777 2005;132(12):2759-70. doi: 10.1242/dev.01856 [published Online First: 20050518]
- 778 46. Kubo F, Takeichi M, Nakagawa S. Wnt2b controls retinal cell differentiation at the ciliary marginal  
779 zone. *Development* 2003;130(3):587-98. doi: 10.1242/dev.00244
- 780 47. Chalazonitis A, Kessler JA. Pleiotropic effects of the bone morphogenetic proteins on development  
781 of the enteric nervous system. *Dev Neurobiol* 2012;72(6):843-56. doi: 10.1002/dneu.22002  
782 [published Online First: 2012/01/04]
- 783 48. Zhao Y, Guan YF, Zhou XM, et al. Regenerative Neurogenesis After Ischemic Stroke Promoted by  
784 Nicotinamide Phosphoribosyltransferase-Nicotinamide Adenine Dinucleotide Cascade. *Stroke*  
785 2015;46(7):1966-74. doi: 10.1161/STROKEAHA.115.009216 [published Online First:  
786 20150609]
- 787 49. Kobayashi H, Yamataka A, Fujimoto T, et al. Mast cells and gut nerve development: implications  
788 for Hirschsprung's disease and intestinal neuronal dysplasia. *J Pediatr Surg* 1999;34(4):543-8.  
789 doi: 10.1016/s0022-3468(99)90069-6 [published Online First: 1999/05/11]
- 790 50. Liu W, Zhang L, Wu R. Enteric Neural Stem Cells Expressing Insulin-Like Growth Factor 1: A  
791 Novel Cellular Therapy for Hirschsprung's Disease in Mouse Model. *DNA Cell Biol*  
792 2018;37(7):642-48. doi: 10.1089/dna.2017.4060 [published Online First: 2018/05/25]
- 793 51. Li S, Nie EH, Yin Y, et al. GDF10 is a signal for axonal sprouting and functional recovery after  
794 stroke. *Nat Neurosci* 2015;18(12):1737-45. doi: 10.1038/nn.4146 [published Online First:  
795 2015/10/27]
- 796 52. Huang JY, Lynn Miskus M, Lu HC. FGF-FGFR Mediates the Activity-Dependent Dendritogenesis  
797 of Layer IV Neurons during Barrel Formation. *J Neurosci* 2017;37(50):12094-105. doi:  
798 10.1523/JNEUROSCI.1174-17.2017 [published Online First: 2017/11/04]
- 799 53. Southard-Smith EM, Kos L, Pavan WJ. Sox10 mutation disrupts neural crest development in Dom  
800 Hirschsprung mouse model. *Nat Genet* 1998;18(1):60-4. doi: 10.1038/ng0198-60
- 801 54. Cummins EP, Crean D. Hypoxia and inflammatory bowel disease. *Microbes Infect*  
802 2017;19(3):210-21. doi: 10.1016/j.micinf.2016.09.004 [published Online First: 2016/09/25]
- 803 55. Van Welden S, Selfridge AC, Hindryckx P. Intestinal hypoxia and hypoxia-induced signalling as  
804 therapeutic targets for IBD. *Nat Rev Gastroenterol Hepatol* 2017;14(10):596-611. doi:  
805 10.1038/nrgastro.2017.101 [published Online First: 2017/08/31]
- 806 56. Giannotta M, Tapete G, Emmi G, et al. Thrombosis in inflammatory bowel diseases: what's the link?  
807 *Thromb J* 2015;13:14. doi: 10.1186/s12959-015-0044-2 [published Online First: 2015/04/14]
- 808 57. Zezos P, Kouklakis G, Saibil F. Inflammatory bowel disease and thromboembolism. *World J*  
809 *Gastroenterol* 2014;20(38):13863-78. doi: 10.3748/wjg.v20.i38.13863 [published Online First:  
810 2014/10/17]
- 811 58. Ji SG, Medvedeva YV, Wang HL, et al. Mitochondrial Zn(2+) Accumulation: A Potential Trigger of  
812 Hippocampal Ischemic Injury. *Neuroscientist* 2019;25(2):126-38. doi:  
813 10.1177/1073858418772548 [published Online First: 2018/05/11]
- 814 59. Qi Z, Shi W, Zhao Y, et al. Zinc accumulation in mitochondria promotes ischemia-induced BBB  
815 disruption through Drp1-dependent mitochondria fission. *Toxicol Appl Pharmacol*  
816 2019;377:114601. doi: 10.1016/j.taap.2019.114601 [published Online First: 2019/06/04]
- 817 60. Brown TA, Clayton DA. Release of replication termination controls mitochondrial DNA copy  
818 number after depletion with 2',3'-dideoxycytidine. *Nucleic Acids Res* 2002;30(9):2004-10. doi:  
819 10.1093/nar/30.9.2004
- 820 61. Lundberg JO, Weitzberg E. Nitric oxide signaling in health and disease. *Cell* 2022;185(16):2853-78.

- 821                   doi: 10.1016/j.cell.2022.06.010 [published Online First: 2022/08/06]  
822   62. Lin M, Xian H, Chen Z, et al. MCM8-mediated mitophagy protects vascular health in response to  
823                   nitric oxide signaling in a mouse model of Kawasaki disease. *Nature Cardiovascular Research*  
824                   2023;2(8):778-92. doi: 10.1038/s44161-023-00314-x  
825   63. Nisoli E, Falcone S, Tonello C, et al. Mitochondrial biogenesis by NO yields functionally active  
826                   mitochondria in mammals. *Proc Natl Acad Sci U S A* 2004;101(47):16507-12. doi:  
827                   10.1073/pnas.0405432101 [published Online First: 2004/11/17]  
828   64. Fadista J, Lund M, Skotte L, et al. Genome-wide association study of Hirschsprung disease detects  
829                   a novel low-frequency variant at the RET locus. *Eur J Hum Genet* 2018;26(4):561-69. doi:  
830                   10.1038/s41431-017-0053-7 [published Online First: 2018/01/31]  
831   65. Tang CS, Gui H, Kapoor A, et al. Trans-ethnic meta-analysis of genome-wide association studies  
832                   for Hirschsprung disease. *Hum Mol Genet* 2016;25(23):5265-75. doi: 10.1093/hmg/ddw333  
833                   [published Online First: 2016/10/06]  
834   66. Bethell G, Wilkinson D, Fawcner-Corbett D, et al. Enteric nervous system stem cells associated  
835                   with thickened extrinsic fibers in short segment aganglionic Hirschsprung's disease gut are  
836                   absent in the total colonic and intestinal variants of disease. *J Pediatr Surg*  
837                   2016;51(10):1581-4. doi: 10.1016/j.jpedsurg.2016.06.006 [published Online First: 20160616]  
838   67. Moore SW. Total colonic aganglionosis and Hirschsprung's disease: a review. *Pediatr Surg Int*  
839                   2015;31(1):1-9. doi: 10.1007/s00383-014-3634-3 [published Online First: 20141031]  
840   68. Jaffe T, Thompson WM. Large-Bowel Obstruction in the Adult: Classic Radiographic and CT  
841                   Findings, Etiology, and Mimics. *Radiology* 2015;275(3):651-63. doi:  
842                   10.1148/radiol.2015140916  
843  
844
